# Supplementary material for: Fluoride recognition by a chiral urea receptor linked to a phthalimide chromophore
Source: Royal Society of Chemistry journal article supplement (doi:10.1039/b908433a), 2009-01-01
Supplement: b908433a.pdf [file b908433a.pdf]

## Supporting Information

### Fluoride recognition by a chiral urea receptor linked to a phthalimide chromophore

Raúl Pérez-Ruiz<sup>†</sup>, Yrene Díaz<sup>†</sup>, Bernd Goldfuss<sup>†</sup>, Dirk Hertel<sup>‡</sup>, Klaus Meerholz<sup>‡</sup> and Axel G. Griesbeck<sup>†\*</sup>

<sup>†</sup>Department of Chemistry, Organic Division, Greinstr. 4, D-50939 Köln, Germany  
Fax: (+0049)-221-4705057

<sup>‡</sup>Department of Chemistry, Physical Division, Luxemburgerstr. 116, D-50939 Köln, Germany

E-mail: [griesbeck@uni-koeln.de](mailto:griesbeck@uni-koeln.de)

#### Table of Contents

|                                                                                                                                                                                                                                                                                                         |       |
|---------------------------------------------------------------------------------------------------------------------------------------------------------------------------------------------------------------------------------------------------------------------------------------------------------|-------|
| This page.....                                                                                                                                                                                                                                                                                          | 1     |
| <sup>1</sup> H-NMR and <sup>13</sup> C-APT-NMR of <b>1</b> (CD <sub>3</sub> CN, 600 MHz).....                                                                                                                                                                                                           | 2     |
| Significant correlations in the <sup>1</sup> H/ <sup>1</sup> H NMR NOEDIFF (DMSO- <i>d</i> <sup>6</sup> , 600 MHz).....                                                                                                                                                                                 | 3     |
| <sup>1</sup> H-NMR and <sup>13</sup> C-APT-NMR of <b>1</b> (CD <sub>3</sub> CN, 600 MHz).....                                                                                                                                                                                                           | 4     |
| Significant correlations in the <sup>1</sup> H/ <sup>1</sup> H NMR NOEDIFF (CD <sub>3</sub> CN, 600 MHz).....                                                                                                                                                                                           | 5     |
| <b>Figure S1:</b> Normalized fluorescence decay traces of <b>1</b> (3.3 x 10 <sup>-6</sup> M) in the absence (—) and in the presence of F <sup>-</sup> (3 x 10 <sup>-4</sup> M) (—) in acetonitrile.....                                                                                                | 6     |
| <b>Figure S2:</b> Emission spectra of <b>1</b> (λ <sub>exc</sub> = 340 nm) in the presence of increasing amounts of DBU (0, 0.033 → 0.3 mM) in acetonitrile.....                                                                                                                                        | 7     |
| <b>Figure S3:</b> Colour changes observed in the emission on addition of F <sup>-</sup> in the absence/presence of methanol (10%) to an acetonitrile solution of <b>1</b> .....                                                                                                                         | 8     |
| <b>Figure S4:</b> Normalized emission spectra (—, λ <sub>exc</sub> = 340 nm and —, λ <sub>exc</sub> = 380 nm) and excitation spectra (—, λ <sub>em</sub> = 430 nm and —, λ <sub>exc</sub> = 520 nm) of <b>1</b> (10 <sup>-4</sup> M) and F <sup>-</sup> (3.4 x 10 <sup>-3</sup> M) in acetonitrile..... | 9     |
| <b>Figure S5:</b> Emission spectra of <b>1</b> (λ <sub>exc</sub> = 340 nm) in acetonitrile in the presence of increasing amounts of:<br>A) <i>R</i> -methylbenzylamine (0 → 0.05 M) and B) <i>S</i> -methylbenzylamine (0 → 0.05 M).....                                                                | 10    |
| <b>Figure S6:</b> Emission spectra of <b>1</b> (λ <sub>exc</sub> = 340 nm) in acetonitrile in the presence of increasing amounts of:<br>A) <i>R</i> -1-phenylethanol (0 → 0.05 M) and B) <i>S</i> -1-phenylethanol (0 → 0.05 M).....                                                                    | 11    |
| <b>Figure S7:</b> Normalized fluorescence decay traces of <b>1</b> (3.3 x 10 <sup>-6</sup> M) in different solvents.....                                                                                                                                                                                | 12    |
| <b>Figure S8:</b> Emission spectra of <b>1</b> (λ <sub>exc</sub> = 340 nm) in the presence of increasing amounts of H <sub>2</sub> PO <sub>4</sub> <sup>-</sup> (0, 0.025 → 0.33 mM) in acetonitrile.....                                                                                               | 13    |
| <b>Optimised geometry coordinates</b> of model system before and after complexation with F <sup>-</sup> .....                                                                                                                                                                                           | 14-15 |

$^1\text{H-NMR}$  and  $^{13}\text{C-APT-NMR}$  of **1** ( $\text{DMSO-}d^6$ , 600 MHz)

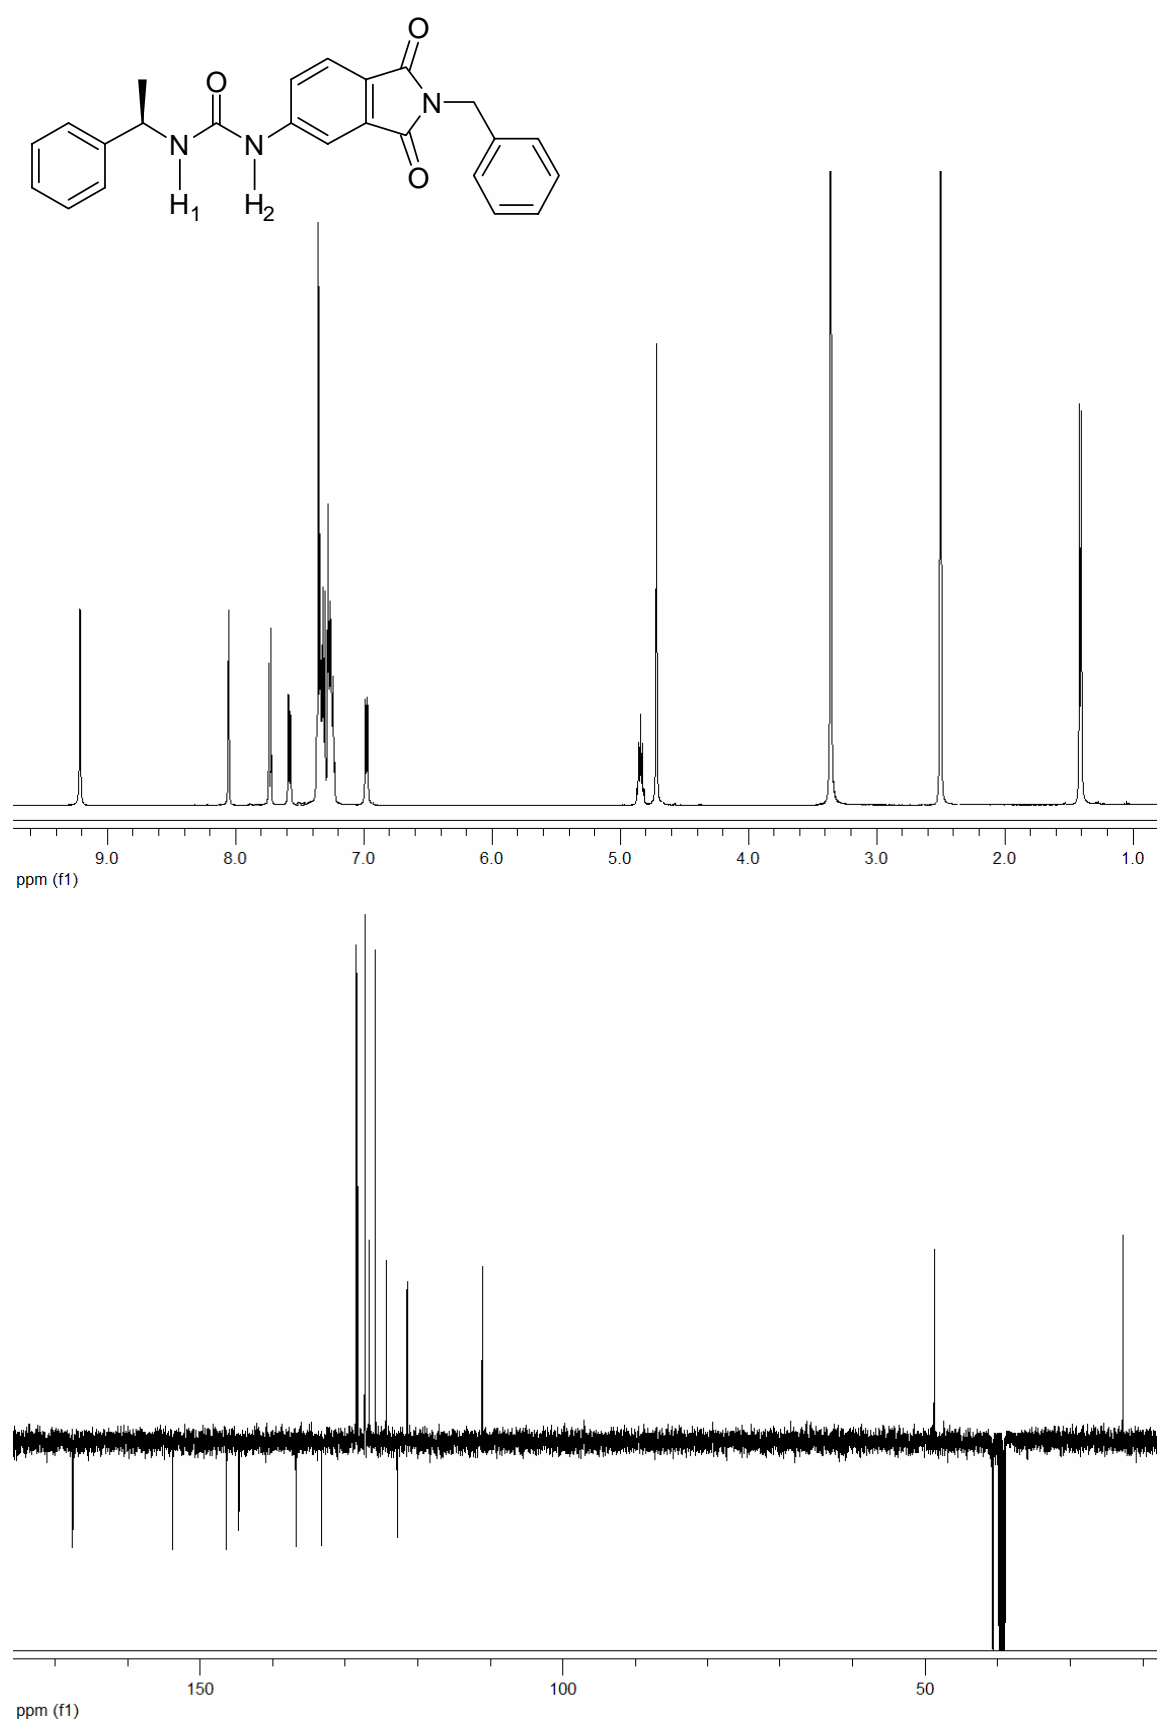

$^1\text{H}/^1\text{H}$  NMR NOEDIFF (DMSO- $d_6$ , 600 MHz)

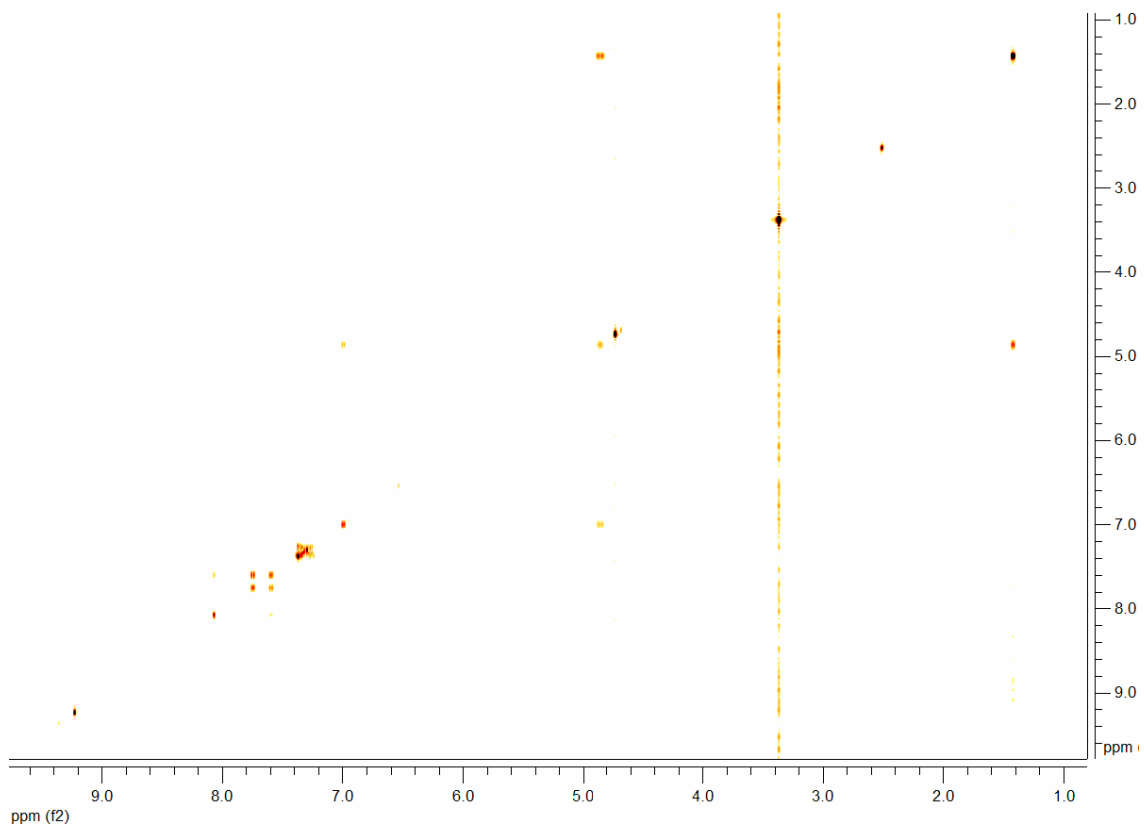

$^1\text{H-NMR}$  and  $^{13}\text{C-APT-NMR}$  of **1** ( $\text{CD}_3\text{CN}$ , 600 MHz)

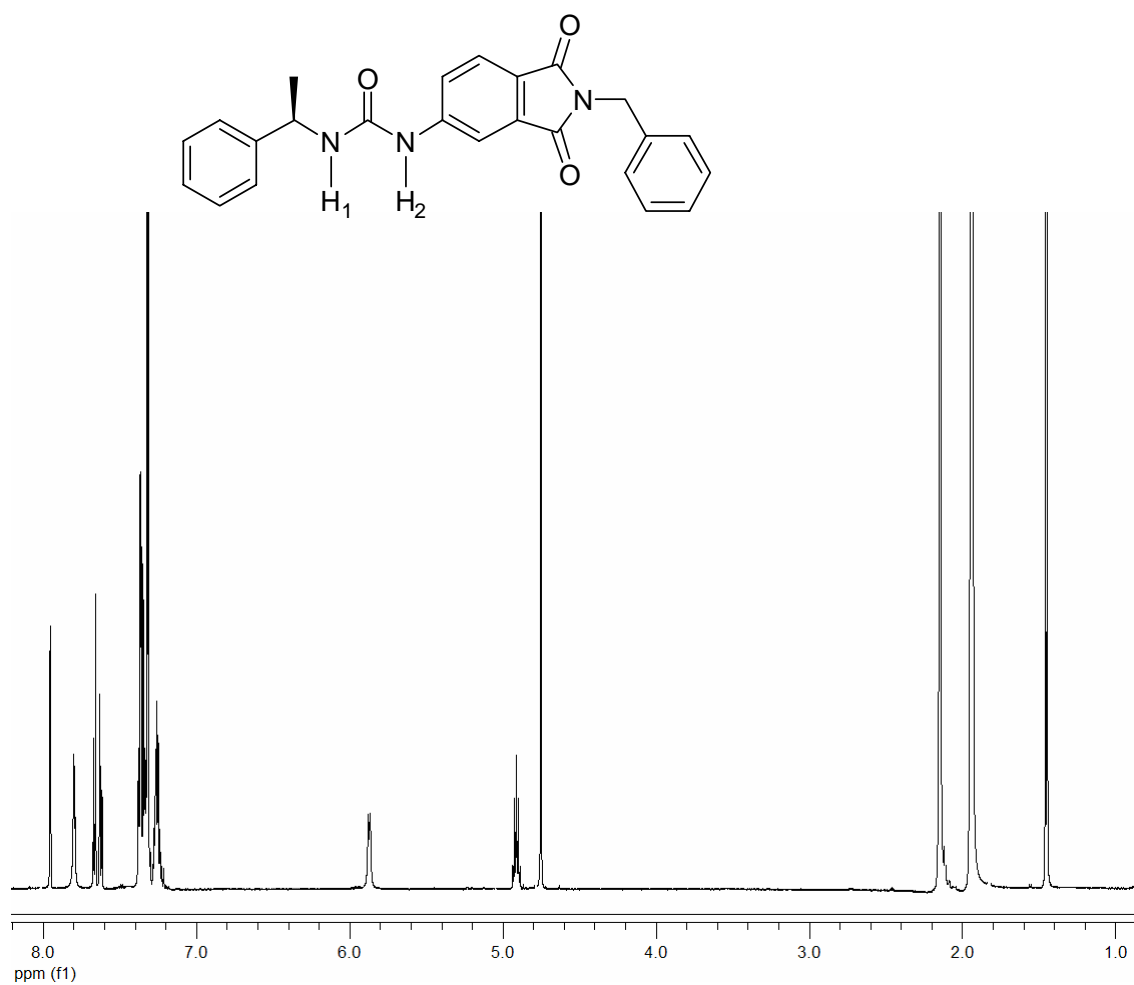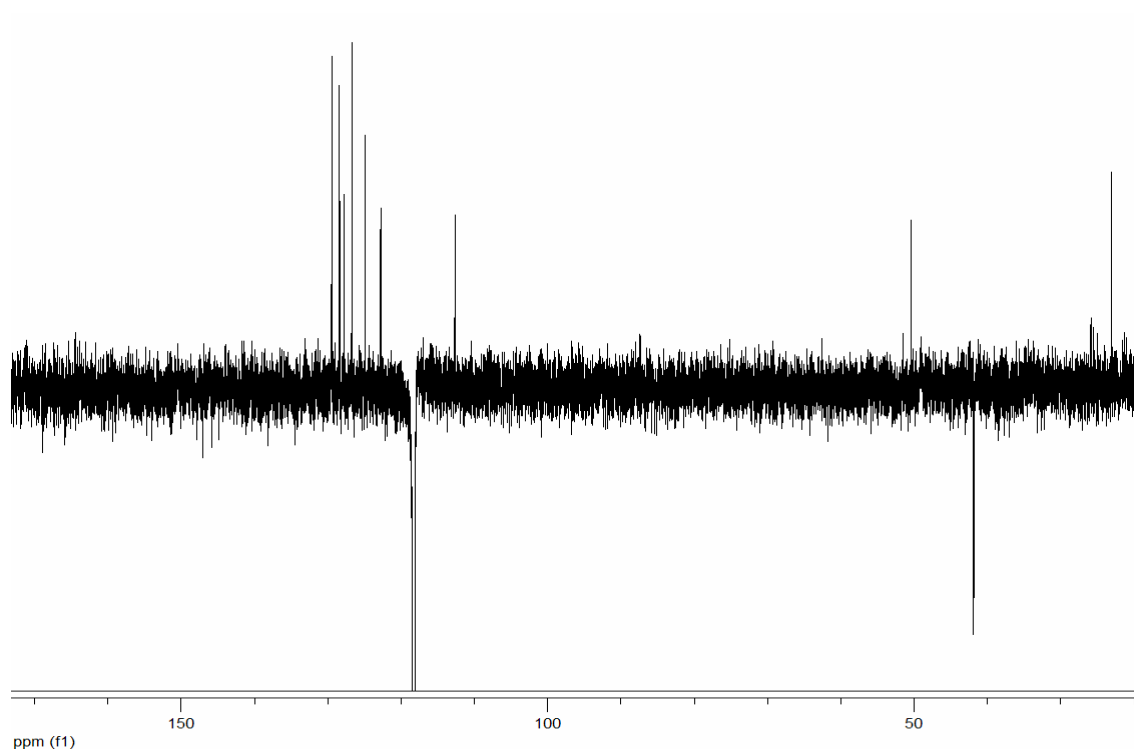

Significant correlations in the  $^1\text{H}/^1\text{H}$  NMR NOEDIFF ( $\text{CD}_3\text{CN}$ , 600 MHz)

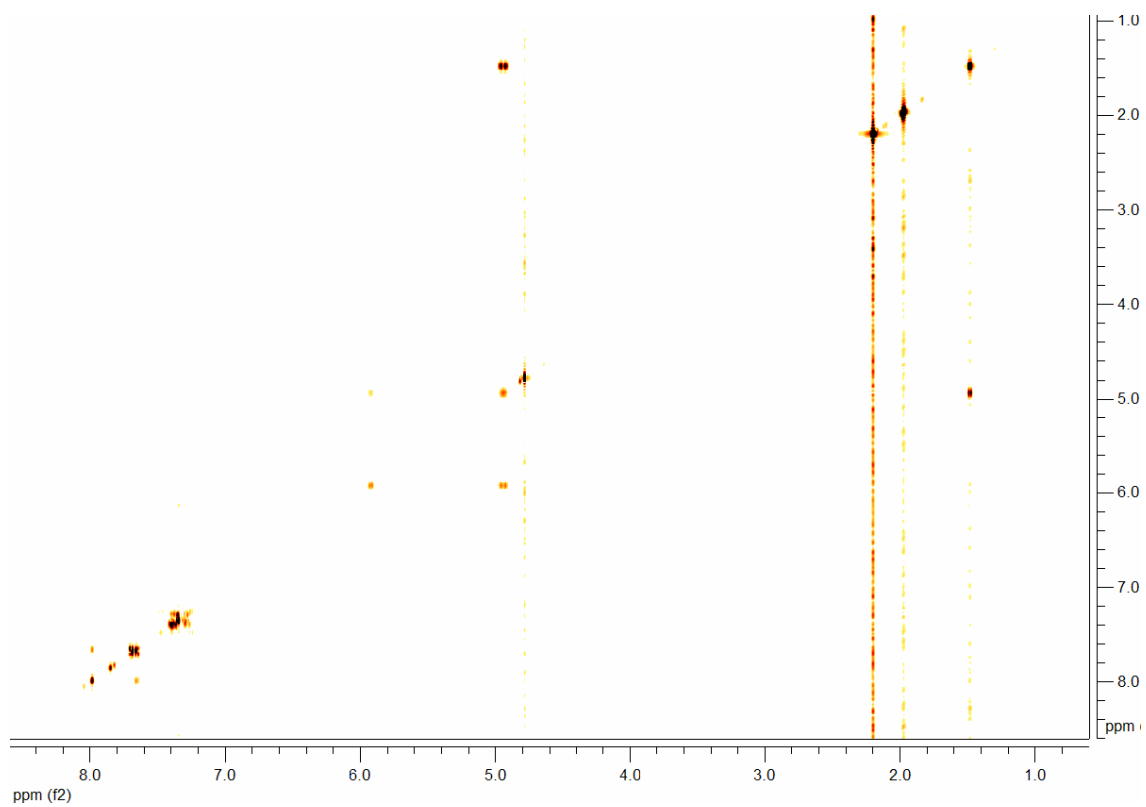

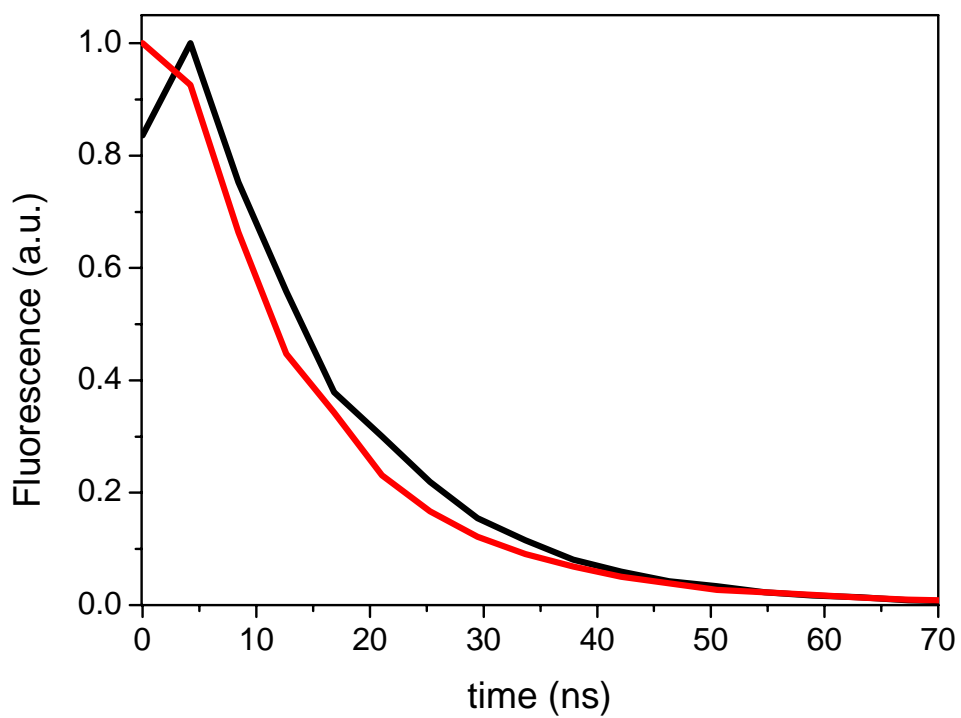

**Figure S1:** Normalized fluorescence decay traces of **1** ( $3.3 \times 10^{-6}$  M) in the absence (—) and in the presence of fluoride anion ( $3 \times 10^{-4}$  M) (—) in acetonitrile.

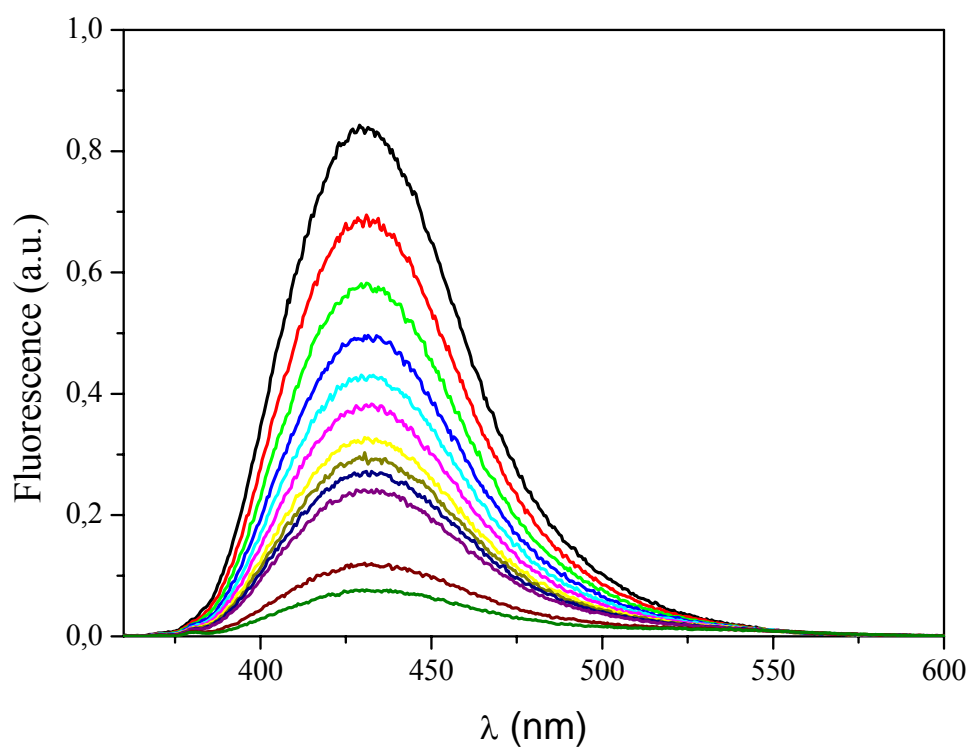

**Figure S2.** Emission spectra of **1** ( $\lambda_{\text{exc}} = 340$  nm) in the presence of increasing amounts of DBU (0, 0.033  $\rightarrow$  0.3 mM) in acetonitrile.

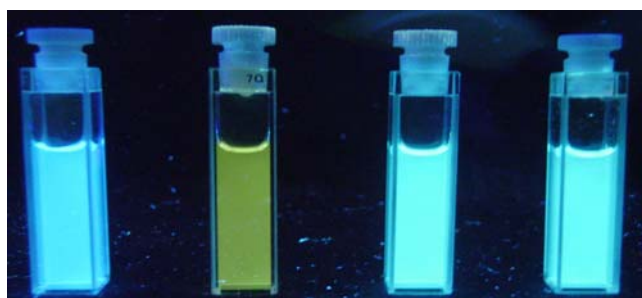

**1**                      **1+F<sup>-</sup>**                      **1+F<sup>-</sup>+MeOH**                      **1+MeOH**

**Figure S3.** Colour changes observed in the emission on addition of F<sup>-</sup> in the absence/presence of methanol (10%) to an acetonitrile solution of **1**.



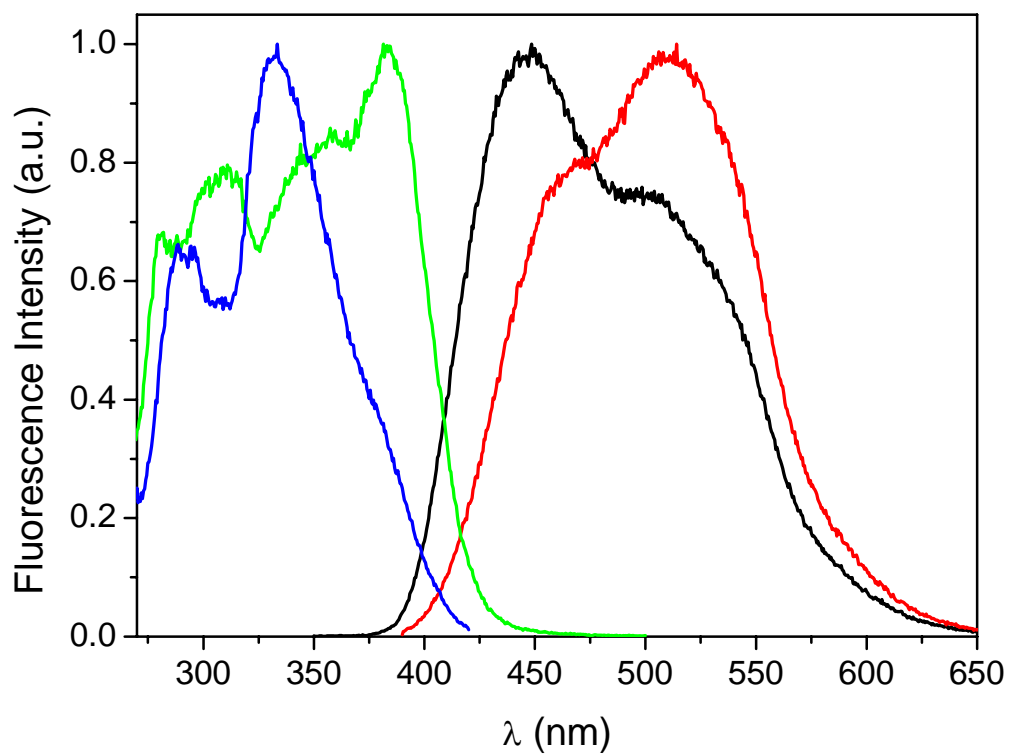

**Figure S4:** Normalized emission spectra (—,  $\lambda_{\text{exc}} = 340$  nm and —,  $\lambda_{\text{exc}} = 380$  nm) and excitation spectra (—,  $\lambda_{\text{em}} = 430$  nm and —,  $\lambda_{\text{exc}} = 520$  nm) of **1** ( $10^{-4}$  M) and  $\text{F}^-$  ( $3.4 \times 10^{-3}$  M) in acetonitrile

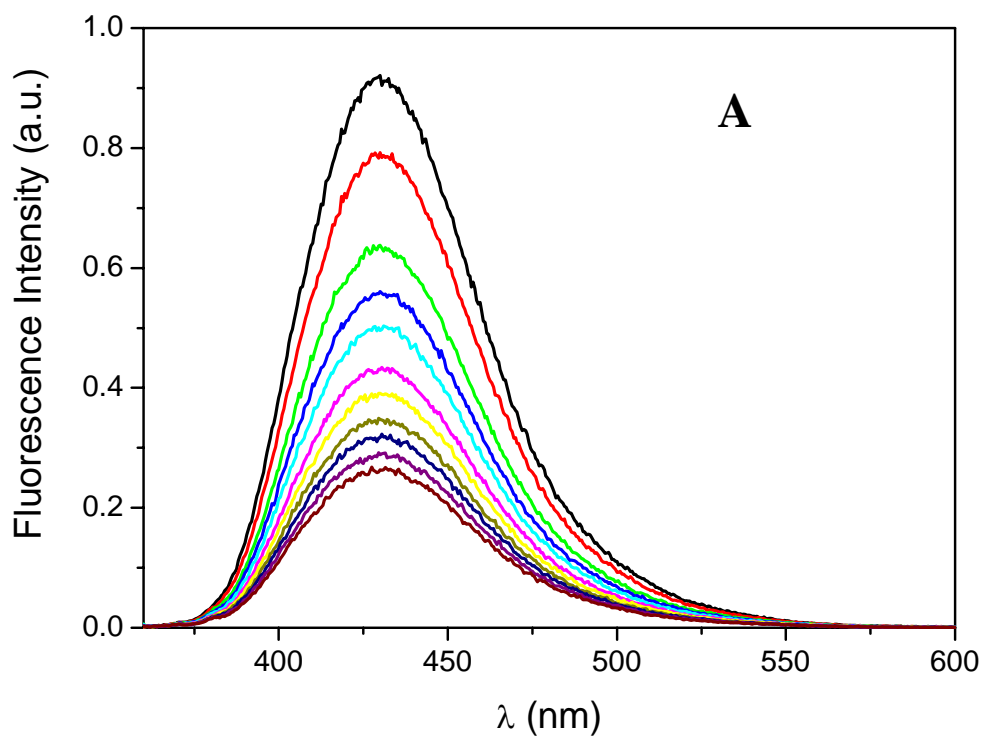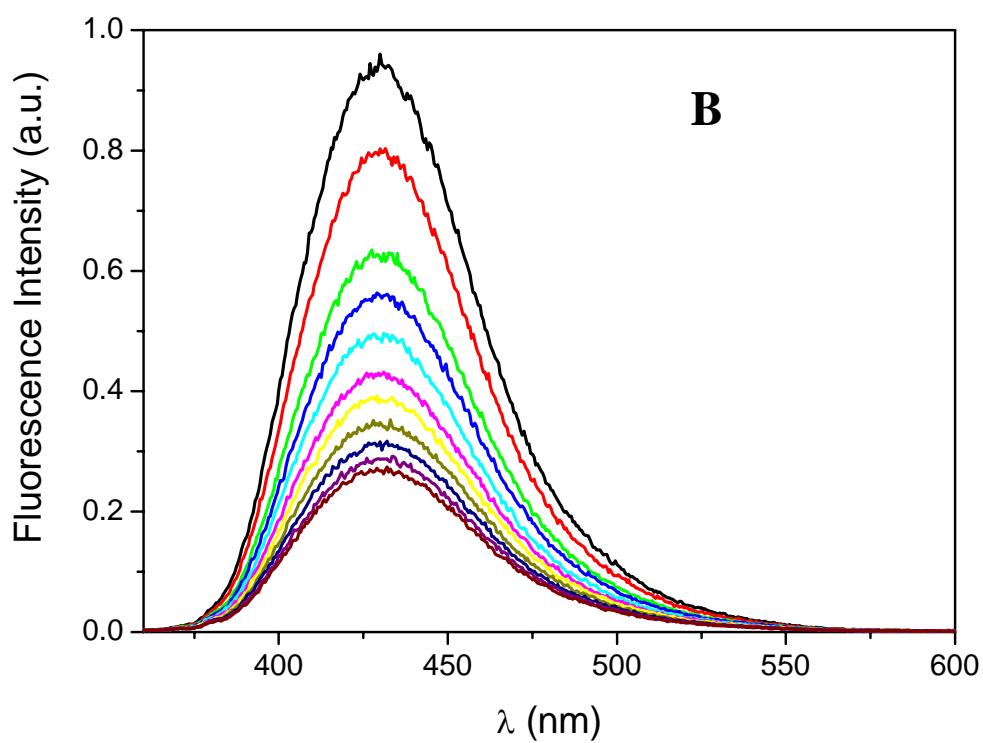

**Figure S5:** Emission spectra of **1** ( $\lambda_{\text{exc}} = 340$  nm) in acetonitrile in the presence of increasing amounts of:  
A) *R*-methylbenzylamine (0  $\rightarrow$  0.05 M) and B) *S*-methylbenzylamine (0  $\rightarrow$  0.05 M)

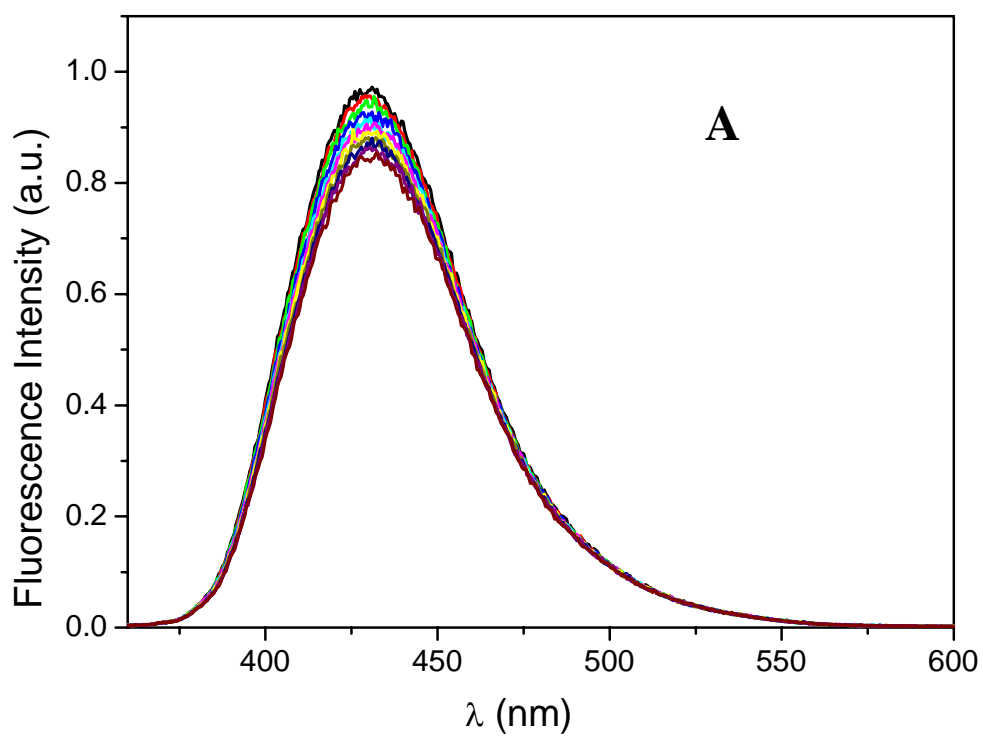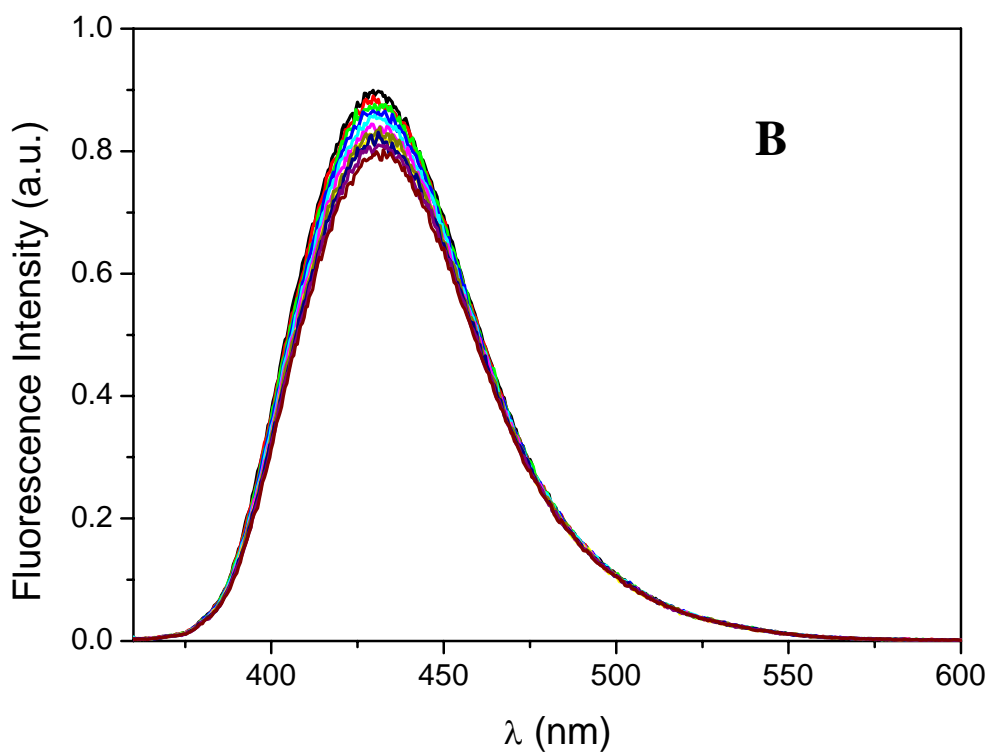

**Figure S6:** Emission spectra of **1** ( $\lambda_{\text{exc}} = 340$  nm) in acetonitrile in the presence of increasing amounts of:  
A) *R*-1-phenylethanol (0  $\rightarrow$  0.05 M) and B) *S*-1-phenylethanol (0  $\rightarrow$  0.05 M)

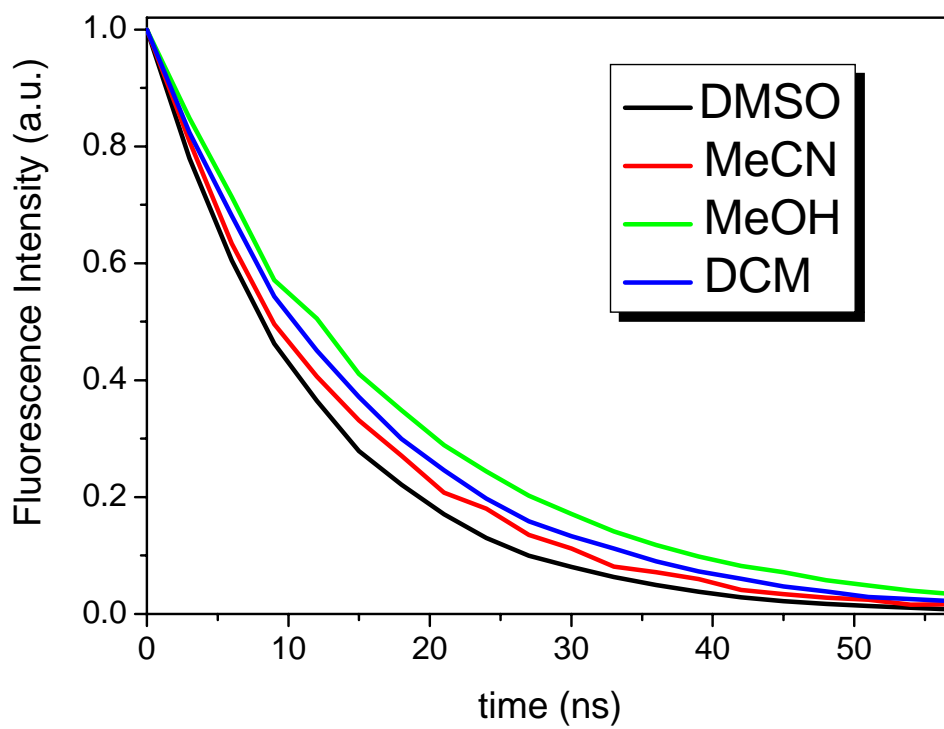

**Figure S7:** Normalized fluorescence decay traces of **1** ( $3.3 \times 10^{-6}$  M) in different solvents

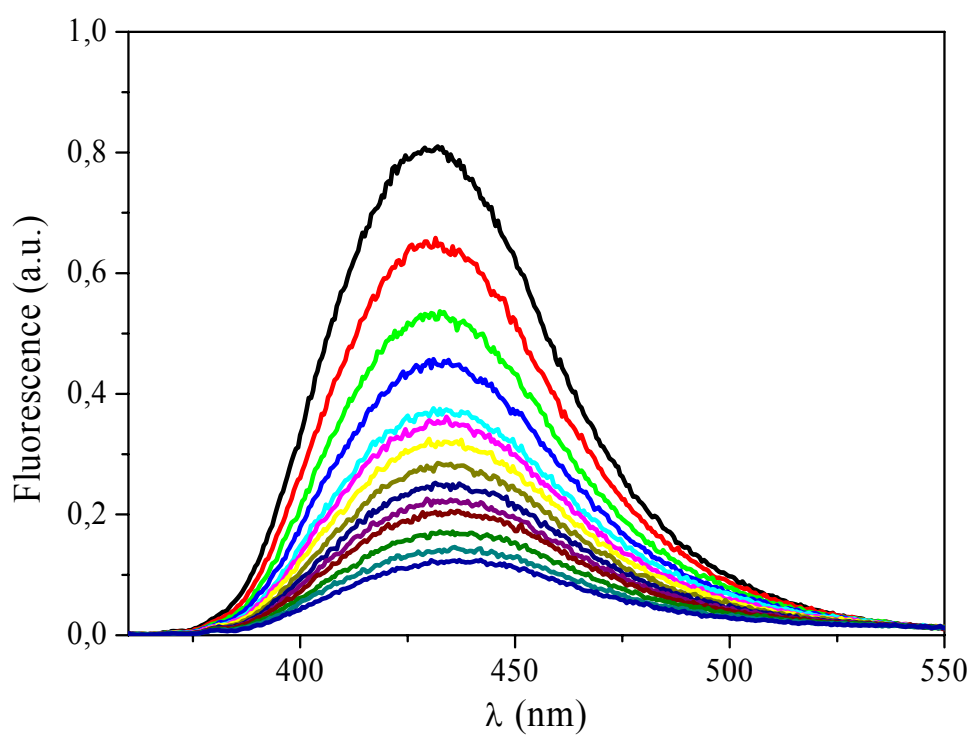

**Figure S8.** Emission spectra of **1** ( $\lambda_{\text{exc}} = 340$  nm) in the presence of increasing amounts of  $\text{H}_2\text{PO}_4^-$  (0, 0.025  $\rightarrow$  0.33 mM) in acetonitrile

**Optimised geometry coordinates** of model system before complexation with F<sup>-</sup>

| Standard orientation |        |        |                         |           |           |
|----------------------|--------|--------|-------------------------|-----------|-----------|
| Centre               | Atomic | Atomic | Coordinates (Angstroms) |           |           |
| Number               | Number | Type   | X                       | Y         | Z         |
| -----                |        |        |                         |           |           |
| -                    |        |        |                         |           |           |
| 1                    | 6      | 0      | -1.719906               | 0.088344  | -0.034325 |
| 2                    | 8      | 0      | -1.707162               | 1.324958  | -0.044103 |
| 3                    | 7      | 0      | -0.581201               | -0.701616 | -0.022295 |
| 4                    | 1      | 0      | -0.730298               | -1.714601 | -0.039448 |
| 5                    | 7      | 0      | -2.883163               | -0.634336 | -0.067140 |
| 6                    | 1      | 0      | -2.845307               | -1.635475 | 0.134844  |
| 7                    | 6      | 0      | -4.167031               | 0.030152  | 0.077461  |
| 8                    | 1      | 0      | -4.954148               | -0.649954 | -0.257879 |
| 9                    | 1      | 0      | -4.375801               | 0.327463  | 1.114896  |
| 10                   | 1      | 0      | -4.183966               | 0.927609  | -0.544564 |
| 11                   | 6      | 0      | 0.766094                | -0.302121 | -0.009073 |
| 12                   | 6      | 0      | 1.192885                | 1.037735  | 0.000188  |
| 13                   | 6      | 0      | 1.734203                | -1.324479 | -0.002535 |
| 14                   | 6      | 0      | 2.559017                | 1.328667  | 0.016717  |
| 15                   | 1      | 0      | 0.458257                | 1.830854  | -0.006723 |
| 16                   | 6      | 0      | 3.092497                | -1.017363 | 0.013190  |
| 17                   | 1      | 0      | 1.409939                | -2.365542 | -0.009676 |
| 18                   | 6      | 0      | 3.518471                | 0.314269  | 0.023364  |
| 19                   | 1      | 0      | 2.871387                | 2.372385  | 0.023897  |
| 20                   | 1      | 0      | 3.820653                | -1.827370 | 0.017727  |
| 21                   | 1      | 0      | 4.579737                | 0.555396  | 0.035872  |

**Optimised geometry coordinates** of model system after complexation with F<sup>-</sup>

B3LYP/6-31G\* SCFR = (CPCM, solvent = acetonitrile)

Standard orientation

| Centre<br>Number | Atomic<br>Number | Atomic<br>Type | Coordinates (Angstroms) |           |           |
|------------------|------------------|----------------|-------------------------|-----------|-----------|
|                  |                  |                | X                       | Y         | Z         |
| 1                | 6                | 0              | -1.493489               | -0.587225 | 0.000119  |
| 2                | 8                | 0              | -1.367959               | -1.830498 | 0.007171  |
| 3                | 7                | 0              | -0.448772               | 0.320116  | -0.005711 |
| 4                | 1                | 0              | -0.779880               | 1.317748  | -0.001336 |
| 5                | 7                | 0              | -2.700717               | 0.036840  | -0.002594 |
| 6                | 1                | 0              | -2.668483               | 1.070913  | -0.007745 |
| 7                | 6                | 0              | -3.945248               | -0.705202 | 0.016765  |
| 8                | 1                | 0              | -4.770441               | 0.009151  | 0.042582  |
| 9                | 1                | 0              | -4.061802               | -1.335308 | -0.873918 |
| 10               | 1                | 0              | -4.020650               | -1.351987 | 0.899524  |
| 11               | 6                | 0              | 0.922718                | 0.078042  | -0.001851 |
| 12               | 6                | 0              | 1.517506                | -1.199632 | -0.018156 |
| 13               | 6                | 0              | 1.766522                | 1.210118  | 0.018334  |
| 14               | 6                | 0              | 2.908740                | -1.323310 | -0.015523 |
| 15               | 1                | 0              | 0.887812                | -2.077766 | -0.032027 |
| 16               | 6                | 0              | 3.151442                | 1.070164  | 0.020151  |
| 17               | 1                | 0              | 1.316412                | 2.199398  | 0.035035  |
| 18               | 6                | 0              | 3.739058                | -0.200035 | 0.002559  |
| 19               | 1                | 0              | 3.344792                | -2.319315 | -0.025847 |
| 20               | 1                | 0              | 3.774979                | 1.960372  | 0.036296  |
| 21               | 1                | 0              | 4.819572                | -0.309646 | 0.004660  |
| 22               | 9                | 0              | -1.806190               | 2.547133  | -0.023428 |
